# Supplementary material for: Sample size determination for estimating antibody seroconversion rate under stable malaria transmission intensity
Source: PubMed Central journal article supplement (PMC4419413; doi:10.1186/s12936-015-0661-z), 2015-04-03

**West Africa**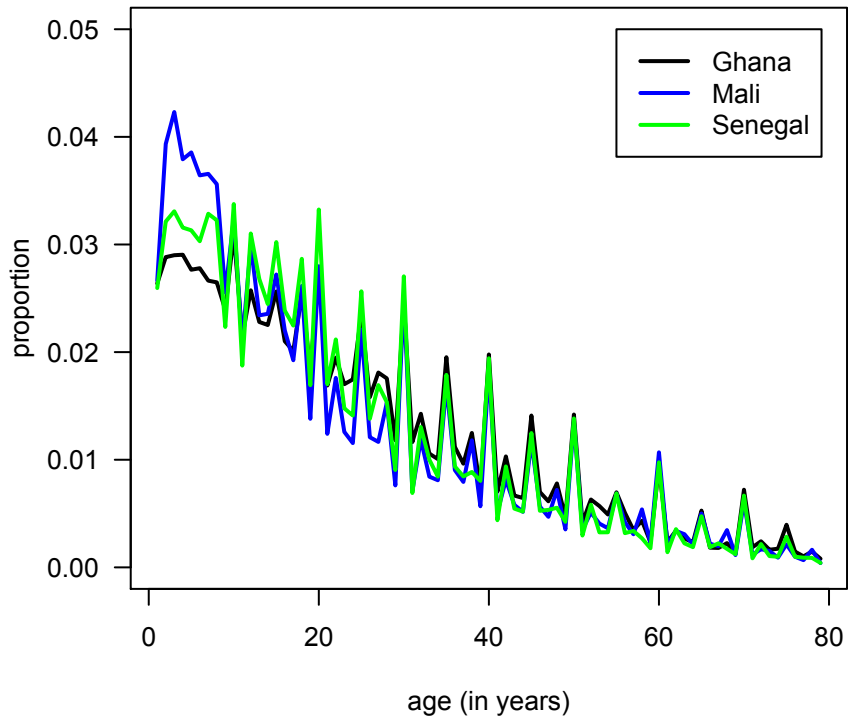**East Africa**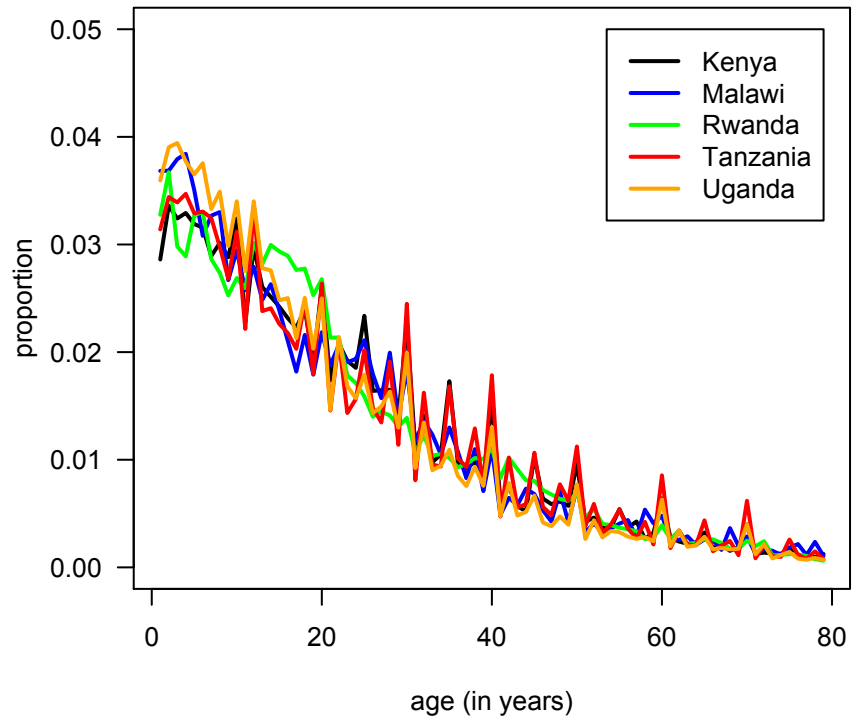**Southeast Asia**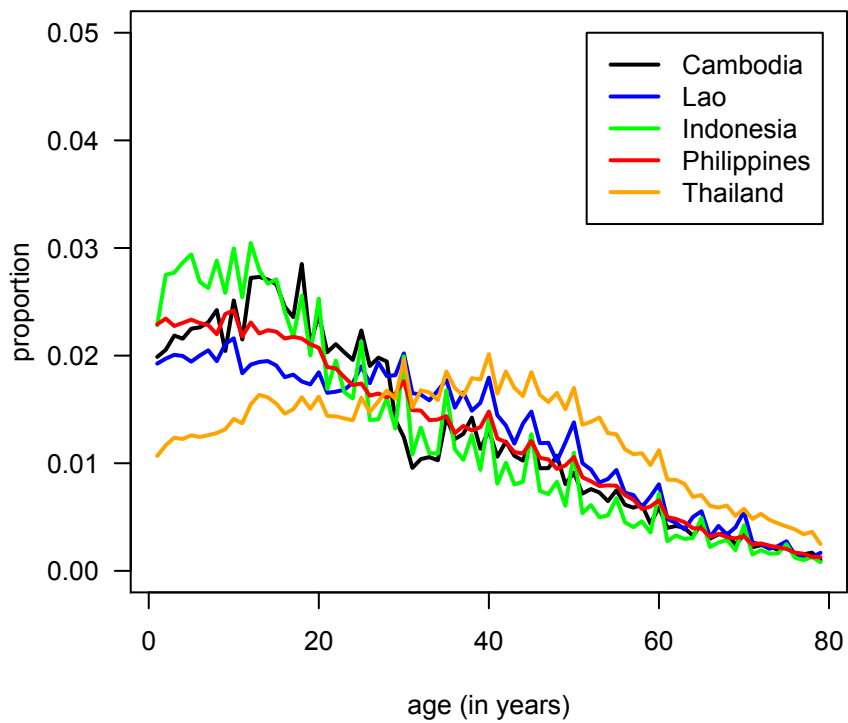**South America**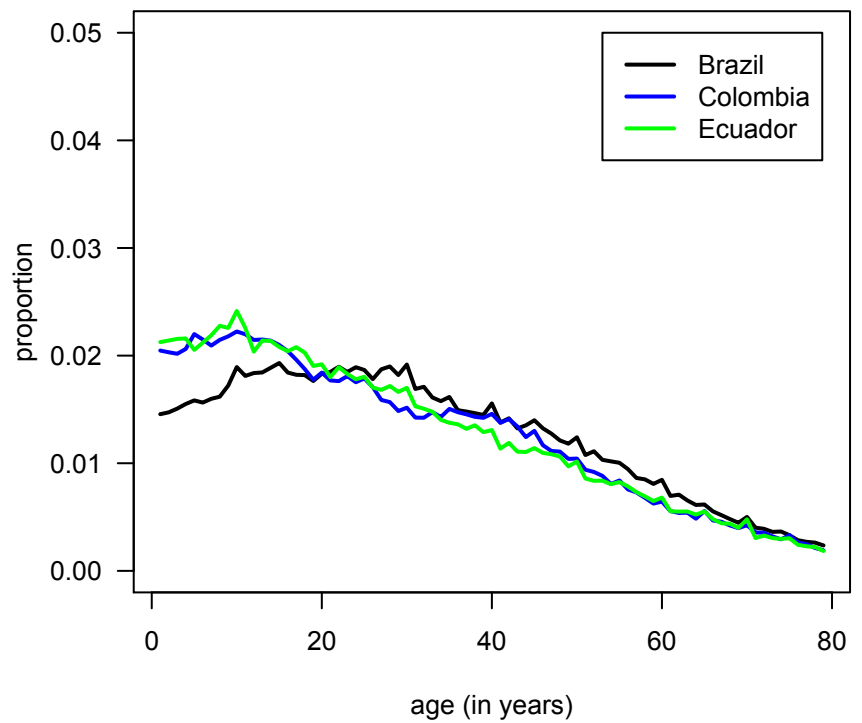

Supplement: 12936_2015_661_MOESM2_ESM.pdf [file 12936_2015_661_MOESM2_ESM.pdf]
