# Supplementary material for: Sample size determination for estimating antibody seroconversion rate under stable malaria transmission intensity
Source: PubMed Central journal article supplement (PMC4419413; doi:10.1186/s12936-015-0661-z), 2015-04-03
Supplement: 12936_2015_661_MOESM4_ESM.pdf [file 12936_2015_661_MOESM4_ESM.pdf]

#### Additional file 4

Absolute seroconversion rate (SCR), entomological inoculation rate (EIR) and seroprevalence ranges using the sample sizes shown in Table 3 and 99% confidence level for the respective intervals.

| population | SCR    | sample size   | absolute SCR range | absolute EIR range | seroprevalence range |
|------------|--------|---------------|--------------------|--------------------|----------------------|
| Africa     | 0.0036 | 281           | 0.0014–0.0062      | 0.00–0.03          | 0.023–0.095          |
|            |        | 494           | 0.0019–0.0055      | 0.00–0.03          | 0.031–0.085          |
|            |        | 1107          | 0.0025–0.0049      | 0.00–0.02          | 0.040–0.076          |
|            |        | 4602          | 0.0030–0.0042      | 0.01–0.01          | 0.049–0.066          |
|            | 0.0108 | 116           | 0.0047–0.0189      | 0.02–0.34          | 0.074–0.248          |
|            |        | 203           | 0.0060–0.0167      | 0.03–0.27          | 0.093–0.225          |
|            |        | 451           | 0.0075–0.0146      | 0.05–0.20          | 0.113–0.202          |
|            |        | 1780          | 0.0091–0.0126      | 0.07–0.15          | 0.135–0.179          |
|            | 0.0324 | 68            | 0.0165–0.0599      | 0.26–3.79          | 0.222–0.523          |
|            |        | 115           | 0.0195–0.0519      | 0.37–2.81          | 0.254–0.486          |
|            |        | 251           | 0.0232–0.0446      | 0.53–2.05          | 0.289–0.446          |
|            |        | 979           | 0.0274–0.0381      | 0.75–1.48          | 0.326–0.406          |
|            | 0.0969 | 75            | 0.0573–0.1940      | 3.46–43.92         | 0.512–0.796          |
|            |        | 121           | 0.0636–0.1631      | 4.30–30.58         | 0.540–0.764          |
|            |        | 251           | 0.0719–0.1368      | 5.55–21.20         | 0.572–0.727          |
|            |        | 949           | 0.0828–0.1148      | 7.45–14.72         | 0.608–0.688          |
| 0.2900     | 145    | 0.1863–0.6188 | 40.35–492.04       | 0.789–0.938        |                      |
|            | 223    | 0.2005–0.5084 | 47.02–326.74       | 0.802–0.922        |                      |
|            | 443    | 0.2206–0.4179 | 57.36–217.23       | 0.819–0.904        |                      |
|            | 1625   | 0.2493–0.3456 | 74.05–146.18       | 0.838–0.883        |                      |
| SEA+SA     | 0.0036 | 223           | 0.0014–0.0062      | 0.00–0.03          | 0.030–0.120          |
|            |        | 402           | 0.0020–0.0055      | 0.00–0.03          | 0.041–0.108          |
|            |        | 861           | 0.0024–0.0048      | 0.00–0.02          | 0.051–0.096          |
|            |        | 3570          | 0.0030–0.0042      | 0.01–0.01          | 0.062–0.084          |
|            | 0.0108 | 94            | 0.0048–0.0191      | 0.02–0.35          | 0.095–0.306          |
|            |        | 165           | 0.0061–0.0168      | 0.03–0.27          | 0.119–0.278          |
|            |        | 367           | 0.0075–0.0146      | 0.05–0.20          | 0.143–0.250          |
|            |        | 1481          | 0.0091–0.0126      | 0.07–0.15          | 0.169–0.222          |
|            | 0.0324 | 62            | 0.0172–0.0610      | 0.28–3.94          | 0.283–0.608          |
|            |        | 104           | 0.0200–0.0524      | 0.39–2.88          | 0.316–0.567          |
|            |        | 222           | 0.0234–0.0449      | 0.53–2.08          | 0.353–0.525          |
|            |        | 864           | 0.0275–0.0382      | 0.75–1.48          | 0.394–0.481          |
|            | 0.0969 | 86            | 0.0596–0.1996      | 3.75–46.57         | 0.601–0.851          |
|            |        | 136           | 0.0652–0.1659      | 4.52–31.71         | 0.625–0.823          |
|            |        | 276           | 0.0727–0.1381      | 5.68–21.61         | 0.653–0.792          |
|            |        | 1031          | 0.0830–0.1151      | 7.49–14.80         | 0.685–0.757          |
| 0.2900     | 202    | 0.1893–0.6275 | 41.74–506.58       | 0.844–0.954        |                      |
|            | 308    | 0.2027–0.5130 | 48.09–332.93       | 0.853–0.943        |                      |
|            | 606    | 0.2218–0.4199 | 58.04–219.33       | 0.865–0.929        |                      |
|            | 2203   | 0.2497–0.3461 | 74.26–146.61       | 0.880–0.913        |                      |
