# Supplementary material for: Sample size determination for estimating antibody seroconversion rate under stable malaria transmission intensity
Source: PubMed Central journal article supplement (PMC4419413; doi:10.1186/s12936-015-0661-z), 2015-04-03
Supplement: 12936_2015_661_MOESM5_ESM.pdf [file 12936_2015_661_MOESM5_ESM.pdf]

## Additional file 5

Results of the simulation study when seroreversion rate is assumed to be unknown. The true seroreversion rate was fixed at 0.017.

| population | SCR    | sample size | relative length | absolute SCR range | EIR range     | seroprevalence range |             |
|------------|--------|-------------|-----------------|--------------------|---------------|----------------------|-------------|
| Africa     | 0.0036 | 250         | 4.38            | 0.0016–0.0174      | 0.00–0.29     | 0.027–0.232          |             |
|            |        | 500         | 1.95            | 0.0020–0.0090      | 0.00–0.07     | 0.033–0.134          |             |
|            |        | 1000        | 1.18            | 0.0023–0.0066      | 0.00–0.04     | 0.037–0.100          |             |
|            |        | 2500        | 0.72            | 0.0026–0.0052      | 0.01–0.02     | 0.042–0.081          |             |
|            |        | 5000        | 0.53            | 0.0028–0.0047      | 0.01–0.02     | 0.045–0.074          |             |
|            |        | 10000       | 0.37            | 0.0030–0.0043      | 0.01–0.02     | 0.048–0.068          |             |
|            | 0.0108 | 0.0108      | 250             | 1.52               | 0.0064–0.0228 | 0.04–0.51            | 0.098–0.286 |
|            |        |             | 500             | 1.01               | 0.0070–0.0179 | 0.04–0.31            | 0.107–0.237 |
|            |        |             | 1000            | 0.68               | 0.0079–0.0152 | 0.06–0.22            | 0.118–0.208 |
|            |        |             | 2500            | 0.43               | 0.0087–0.0134 | 0.07–0.17            | 0.130–0.188 |
|            |        |             | 5000            | 0.30               | 0.0093–0.0126 | 0.08–0.15            | 0.137–0.178 |
|            |        |             | 10000           | 0.22               | 0.0097–0.0120 | 0.09–0.13            | 0.142–0.171 |
|            | 0.0324 | 0.0324      | 250             | 0.90               | 0.0219–0.0509 | 0.47–2.7             | 0.277–0.481 |
|            |        |             | 500             | 0.62               | 0.0243–0.0444 | 0.58–2.04            | 0.299–0.445 |
|            |        |             | 1000            | 0.43               | 0.0263–0.0403 | 0.68–1.66            | 0.316–0.420 |
|            |        |             | 2500            | 0.27               | 0.0284–0.0371 | 0.80–1.40            | 0.334–0.399 |
|            |        |             | 5000            | 0.19               | 0.0295–0.0356 | 0.87–1.29            | 0.343–0.389 |
|            |        |             | 10000           | 0.13               | 0.0304–0.0346 | 0.92–1.21            | 0.350–0.382 |
|            | 0.0969 | 0.0969      | 250             | 0.71               | 0.0710–0.1400 | 5.41–22.24           | 0.568–0.732 |
|            |        |             | 500             | 0.48               | 0.0777–0.1244 | 6.53–17.39           | 0.592–0.706 |
|            |        |             | 1000            | 0.34               | 0.0824–0.1150 | 7.37–14.77           | 0.607–0.688 |
|            |        |             | 2500            | 0.21               | 0.0878–0.1077 | 8.41–12.89           | 0.623–0.673 |
|            |        |             | 5000            | 0.14               | 0.0903–0.1043 | 8.93–12.06           | 0.630–0.665 |
|            |        |             | 10000           | 0.10               | 0.0921–0.1022 | 9.31–11.55           | 0.635–0.660 |
| 0.2900     | 0.2900 | 250         | 0.80            | 0.2073–0.4394      | 50.39–241.12  | 0.808–0.909          |             |
|            |        | 500         | 0.52            | 0.2288–0.3804      | 61.91–178.55  | 0.825–0.894          |             |
|            |        | 1000        | 0.36            | 0.2454–0.3500      | 71.62–150.14  | 0.836–0.884          |             |
|            |        | 2500        | 0.22            | 0.2605–0.3250      | 81.16–128.65  | 0.845–0.875          |             |
|            |        | 5000        | 0.16            | 0.2689–0.3145      | 86.65–120.09  | 0.849–0.871          |             |
|            |        | 10000       | 0.11            | 0.2747–0.3072      | 90.62–114.40  | 0.852–0.868          |             |
| SEA+SA     | 0.0036 | 250         | 5.29            | 0.0017–0.0208      | 0.00–0.42     | 0.028–0.266          |             |
|            |        | 500         | 2.24            | 0.0020–0.0100      | 0.00–0.09     | 0.033–0.147          |             |
|            |        | 1000        | 1.27            | 0.0022–0.0068      | 0.00–0.04     | 0.036–0.104          |             |
|            |        | 2500        | 0.78            | 0.0025–0.0053      | 0.01–0.02     | 0.041–0.083          |             |
|            |        | 5000        | 0.54            | 0.0028–0.0047      | 0.01–0.02     | 0.045–0.074          |             |
|            |        | 10000       | 0.39            | 0.0030–0.0044      | 0.01–0.02     | 0.048–0.069          |             |
|            | 0.0108 | 0.0108      | 250             | 1.64               | 0.0063–0.0241 | 0.03–0.57            | 0.097–0.297 |
|            |        |             | 500             | 1.06               | 0.0070–0.0184 | 0.04–0.32            | 0.106–0.242 |
|            |        |             | 1000            | 0.73               | 0.0076–0.0155 | 0.05–0.23            | 0.115–0.211 |
|            |        |             | 2500            | 0.45               | 0.0086–0.0135 | 0.07–0.17            | 0.128–0.189 |
|            |        |             | 5000            | 0.32               | 0.0093–0.0127 | 0.08–0.15            | 0.137–0.179 |
|            |        |             | 10000           | 0.22               | 0.0097–0.0121 | 0.08–0.14            | 0.142–0.172 |
|            | 0.0324 | 0.0324      | 250             | 0.99               | 0.0213–0.0534 | 0.44–2.99            | 0.271–0.493 |
|            |        |             | 500             | 0.67               | 0.0236–0.0454 | 0.55–2.13            | 0.293–0.450 |
|            |        |             | 1000            | 0.47               | 0.0259–0.0410 | 0.66–1.73            | 0.313–0.424 |
|            |        |             | 2500            | 0.29               | 0.0281–0.0374 | 0.79–1.43            | 0.332–0.401 |
|            |        |             | 5000            | 0.20               | 0.0294–0.0359 | 0.86–1.31            | 0.342–0.391 |
|            |        |             | 10000           | 0.14               | 0.0302–0.0349 | 0.91–1.23            | 0.349–0.383 |
|            | 0.0969 | 0.0969      | 250             | 0.82               | 0.0681–0.1480 | 4.96–24.97           | 0.558–0.744 |
|            |        |             | 500             | 0.56               | 0.0755–0.1295 | 6.15–18.90           | 0.584–0.715 |
|            |        |             | 1000            | 0.37               | 0.0809–0.1172 | 7.10–15.37           | 0.602–0.693 |
|            |        |             | 2500            | 0.24               | 0.0862–0.1095 | 8.11–13.33           | 0.618–0.677 |
|            |        |             | 5000            | 0.17               | 0.0892–0.1057 | 8.70–12.39           | 0.627–0.669 |
|            |        |             | 10000           | 0.12               | 0.0914–0.1030 | 9.16–11.73           | 0.633–0.662 |
| 0.2900     | 0.2900 | 250         | 1.15            | 0.1944–0.5272      | 44.11–352.37  | 0.797–0.925          |             |
|            |        | 500         | 0.73            | 0.2152–0.4255      | 54.47–225.48  | 0.814–0.905          |             |
|            |        | 1000        | 0.47            | 0.2355–0.3708      | 65.73–169.31  | 0.829–0.891          |             |
|            |        | 2500        | 0.29            | 0.2523–0.3374      | 75.91–139.07  | 0.840–0.880          |             |
|            |        | 5000        | 0.21            | 0.2629–0.3228      | 82.69–126.84  | 0.846–0.874          |             |
|            |        | 10000       | 0.14            | 0.2703–0.3121      | 87.59–118.22  | 0.850–0.870          |             |
