# Supplementary material for: Sample size determination for estimating antibody seroconversion rate under stable malaria transmission intensity
Source: Springer Nature journal article supplement (doi:10.1186/s12936-015-0661-z), 2015-04-02

**A****Africa**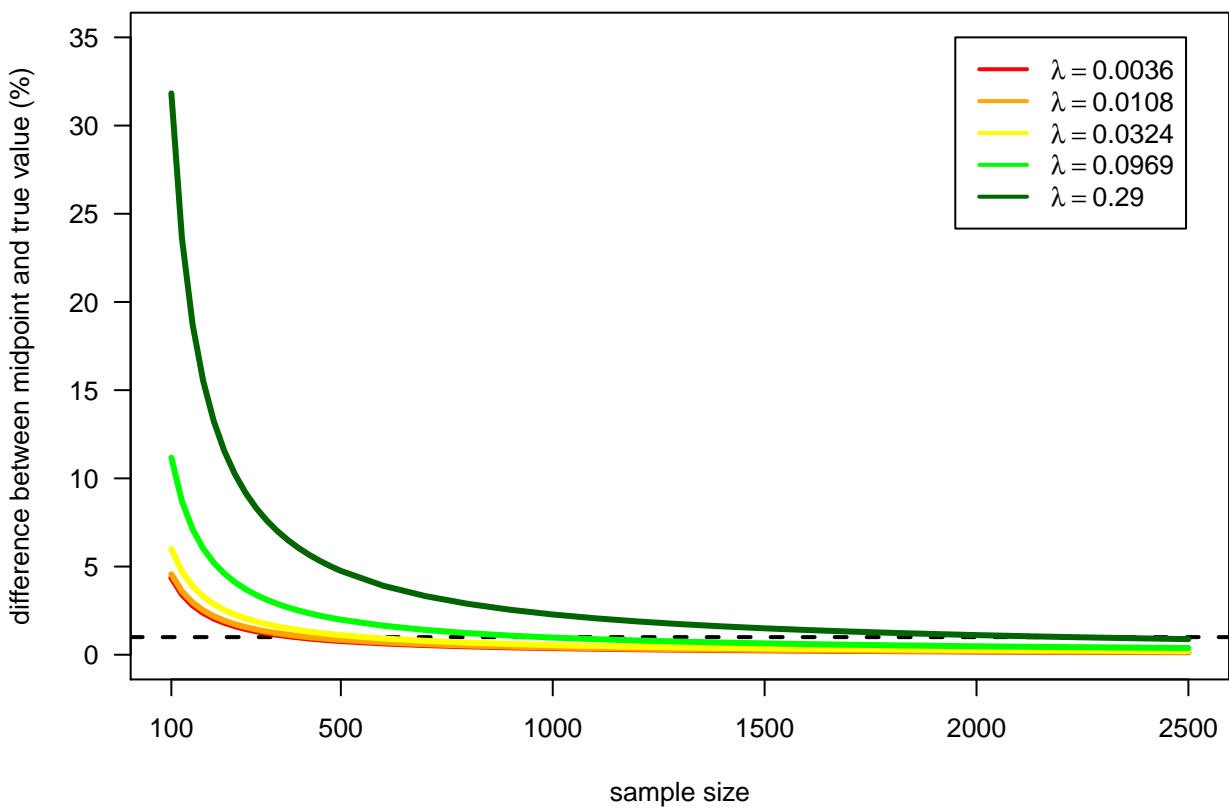**Southeast Asia & South America**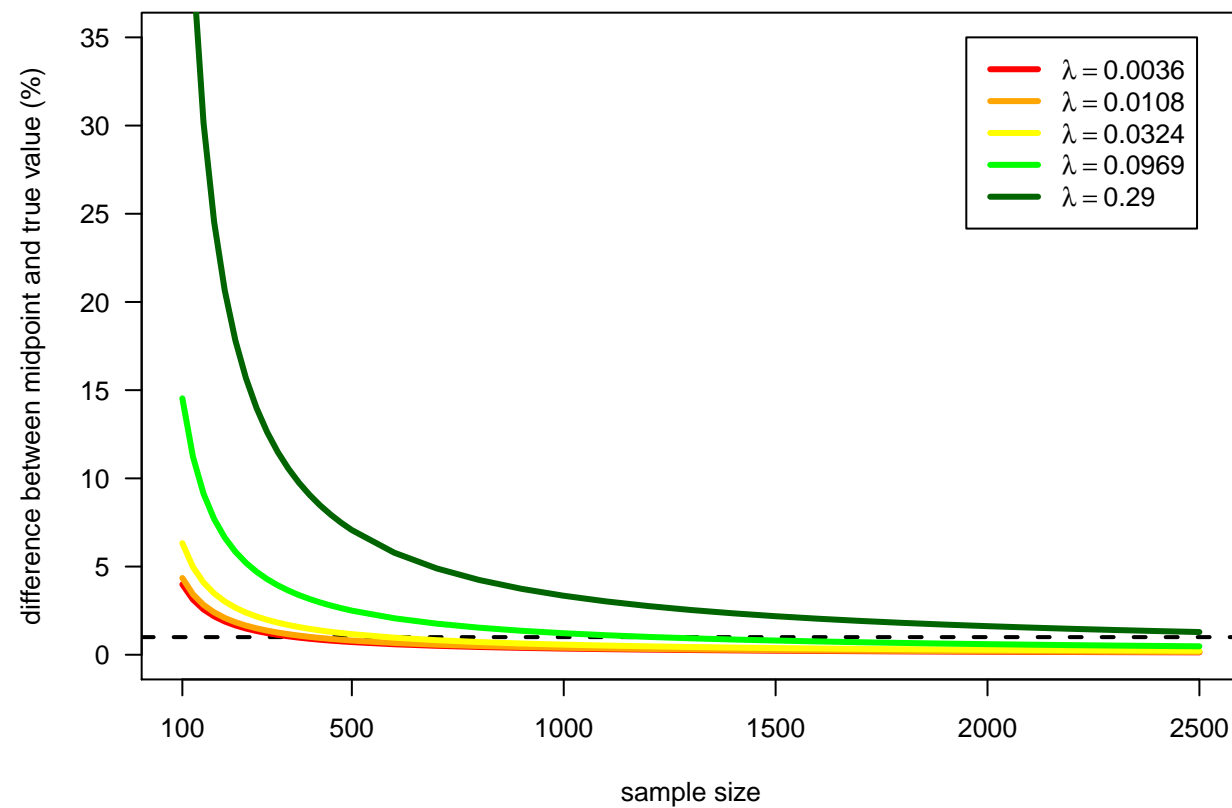**B**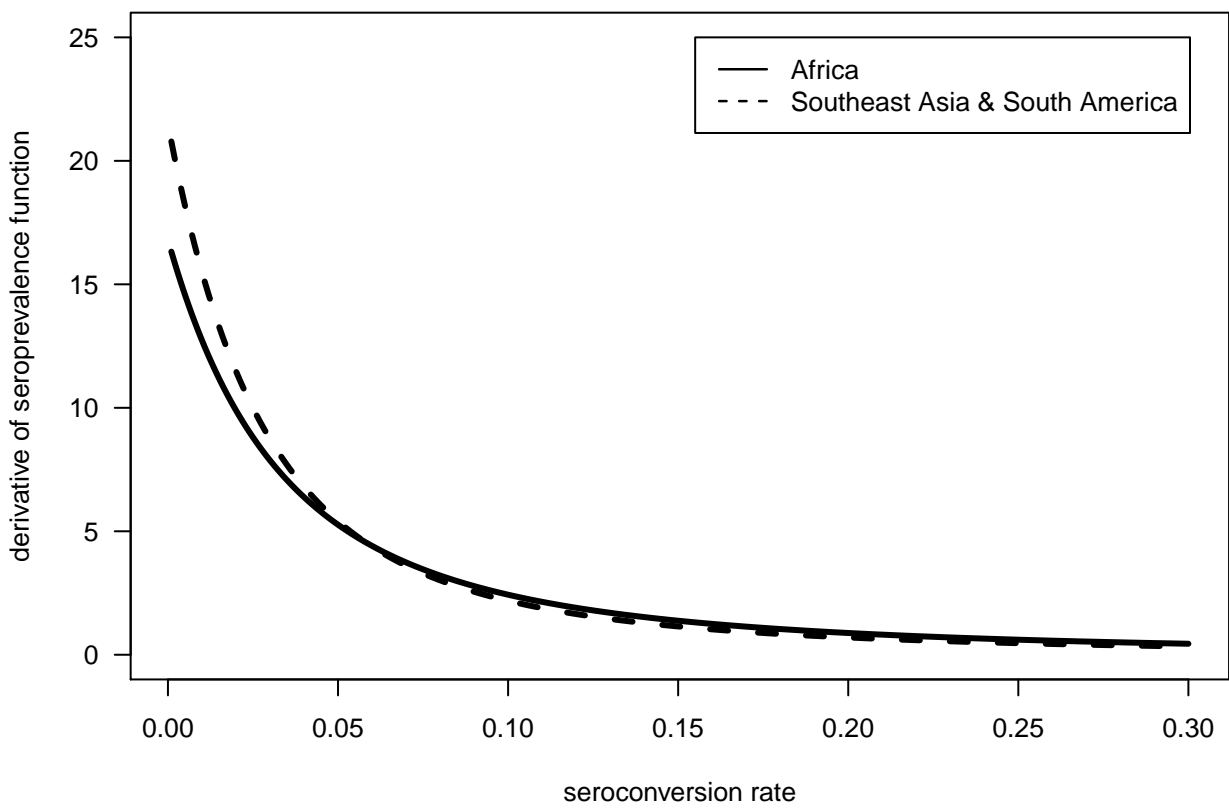

Supplement: MOESM3 [file 9761196]
